# Supplementary material for: Zinc triflate catalyzed solvent free synthesis of coumarins
Source: Research Square preprint supplement (doi:10.21203/rs.3.rs-8490346/v1), 2026-02-05

**Zinc triflate catalyzed solvent free synthesis of coumarins**

S. S. Kale1, 2 ***†***, N. K. Dhurve1,3 ***†***, Shaikh Tanveer1, Mohammad Ali1, Abhijit B. Ingle1,4 †, Nilesh S Shelke1,5, Rohinee R. Dharamkar1 and Hemant S. Chandak1*

1Department of Chemistry, G S Science, Arts and Commerce College, Khamgaon, Nandura Road, Khamgaon, 444 303, Maharashtra, India.

2Department of Chemistry, Shri Shivaji Science and Arts College Chikhli,

443 201, Maharashtra, India

3Department of Chemistry, Shri Pundlik Maharaj Mahavidyalaya Nandura Rly, 443 404, Maharashtra, India

4 Department of Chemistry, Dr. Ghali College, Gadhinglaj

District - Kolhapur, 416 502 Maharashtra, India.

5Department of Chemistry, Arts and Commerce College, Warwat Bakal, 444 202, Maharashtra, India.

**Supporting Information**

Contents

[1H NMR of the compound 3a S2](#_Toc218098999)

[1H NMR of the compound 3b S3](#_Toc218099000)

[1H NMR of the compound 3c S4](#_Toc218099001)

[1H NMR of the compound 3e S5](#_Toc218099002)

[1H NMR of the compound 3f S6](#_Toc218099003)

[Mass spectrum of the compound 3g S7](#_Toc218099004)

[1H NMR of the compound 3j S9](#_Toc218099005)

[1H NMR of the compound 3k S10](#_Toc218099006)

[1H NMR of the compound 3l S11](#_Toc218099007)

[1H NMR of the compound 3m S12](#_Toc218099008)

# 1H NMR of the compound 3a


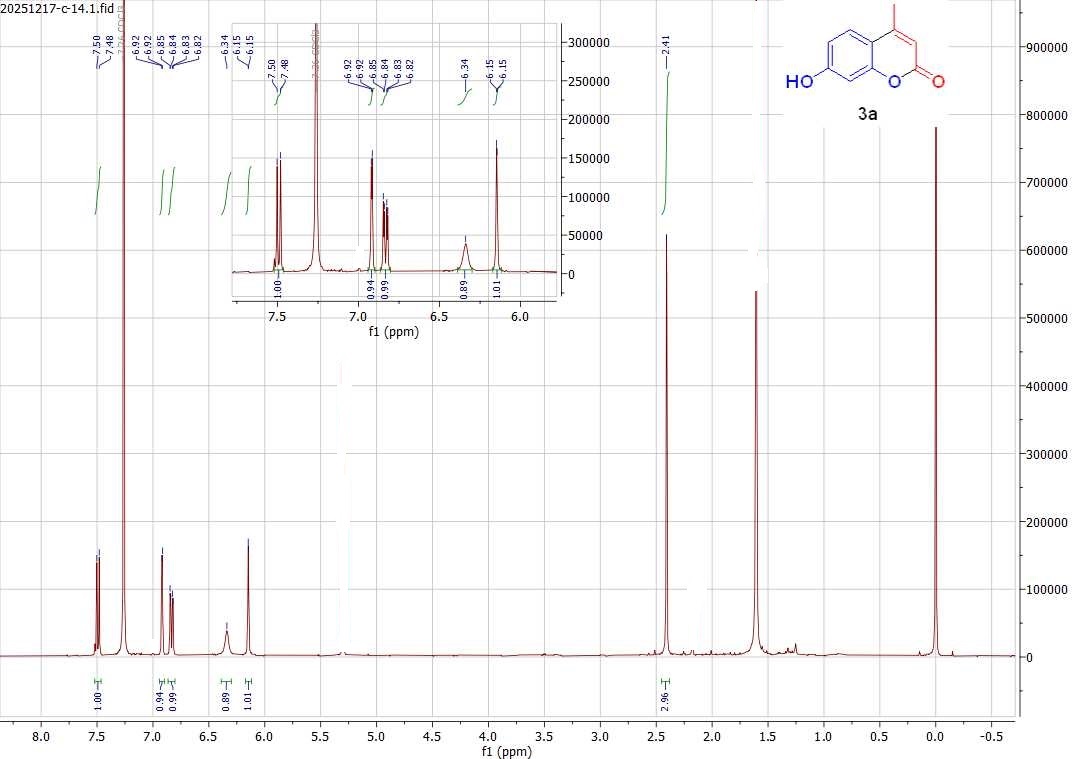


# 1H NMR of the compound 3b


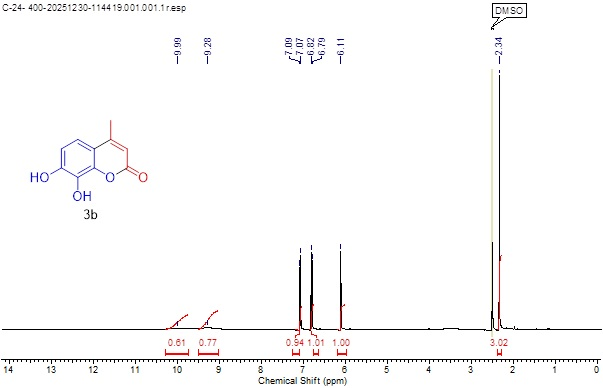


# 1H NMR of the compound 3c


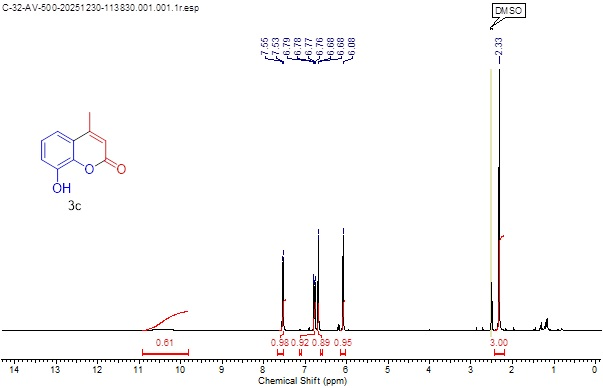


# 1H NMR of the compound 3e


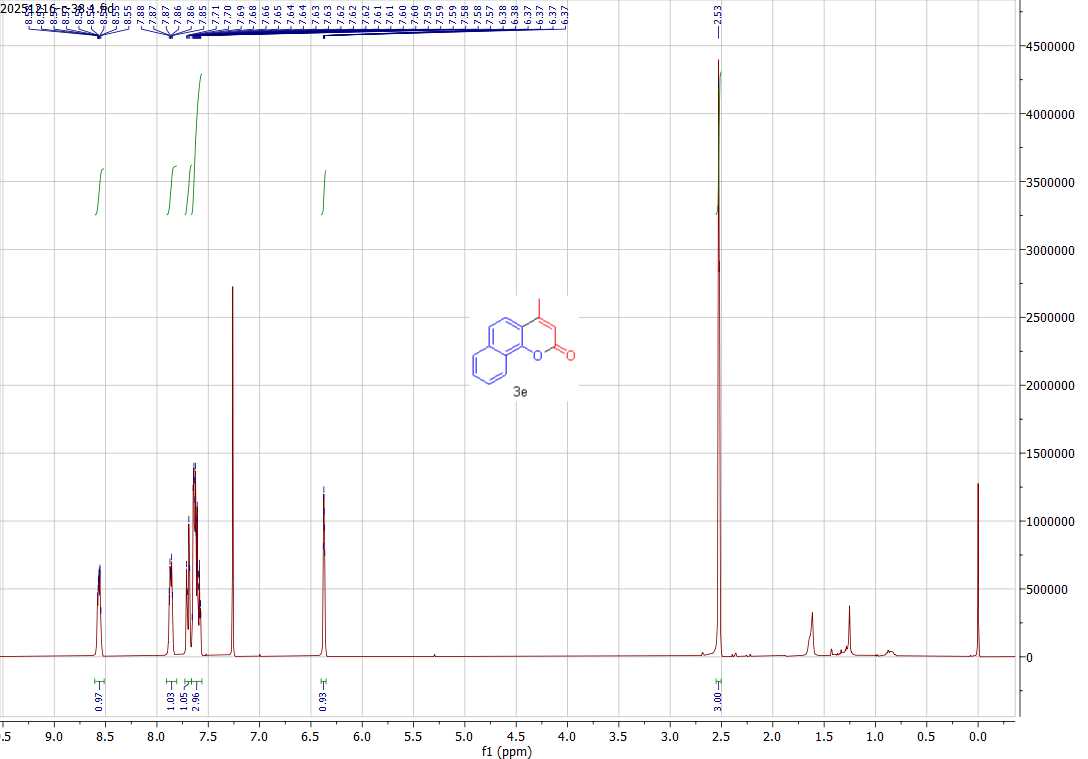


# 1H NMR of the compound 3f


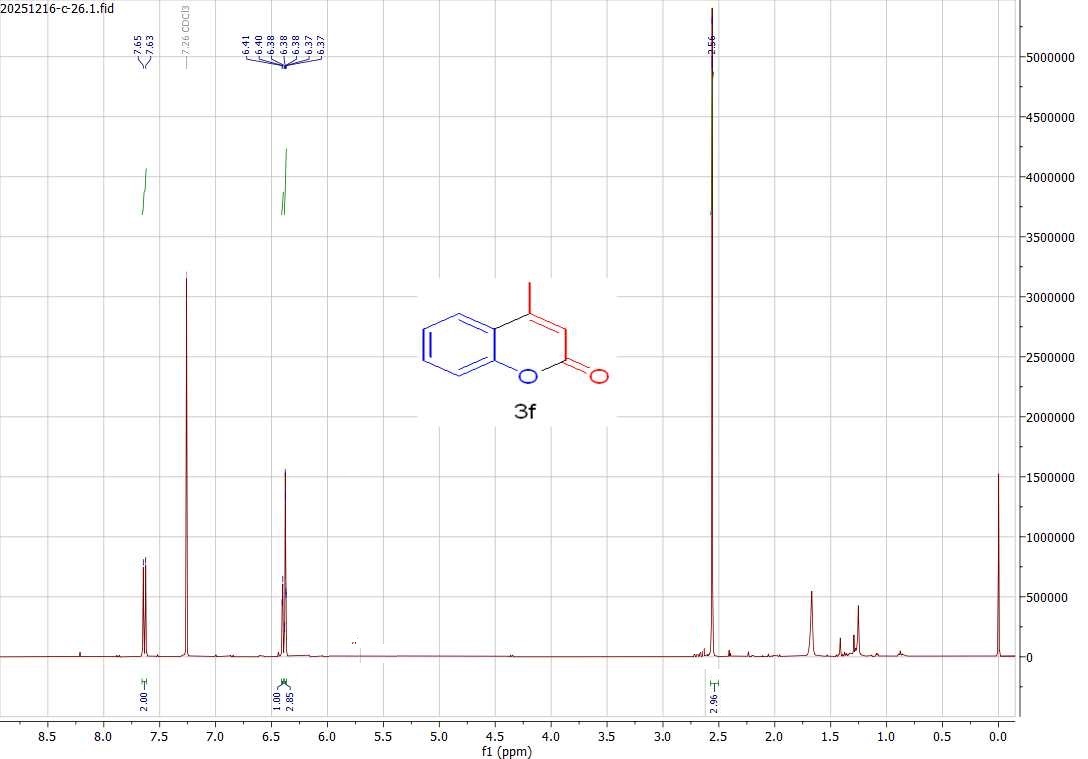


# Mass spectrum of the compound 3g


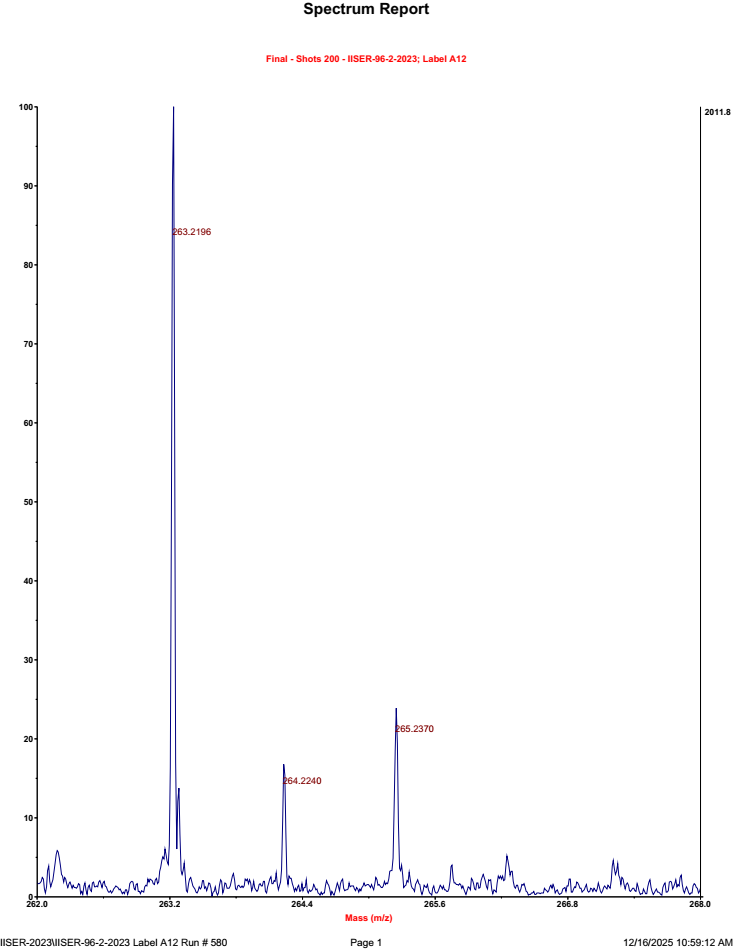


**1H NMR of the compound 3i**


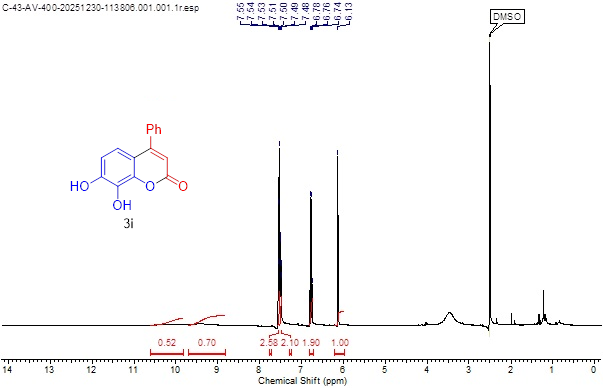


# 1H NMR of the compound 3j


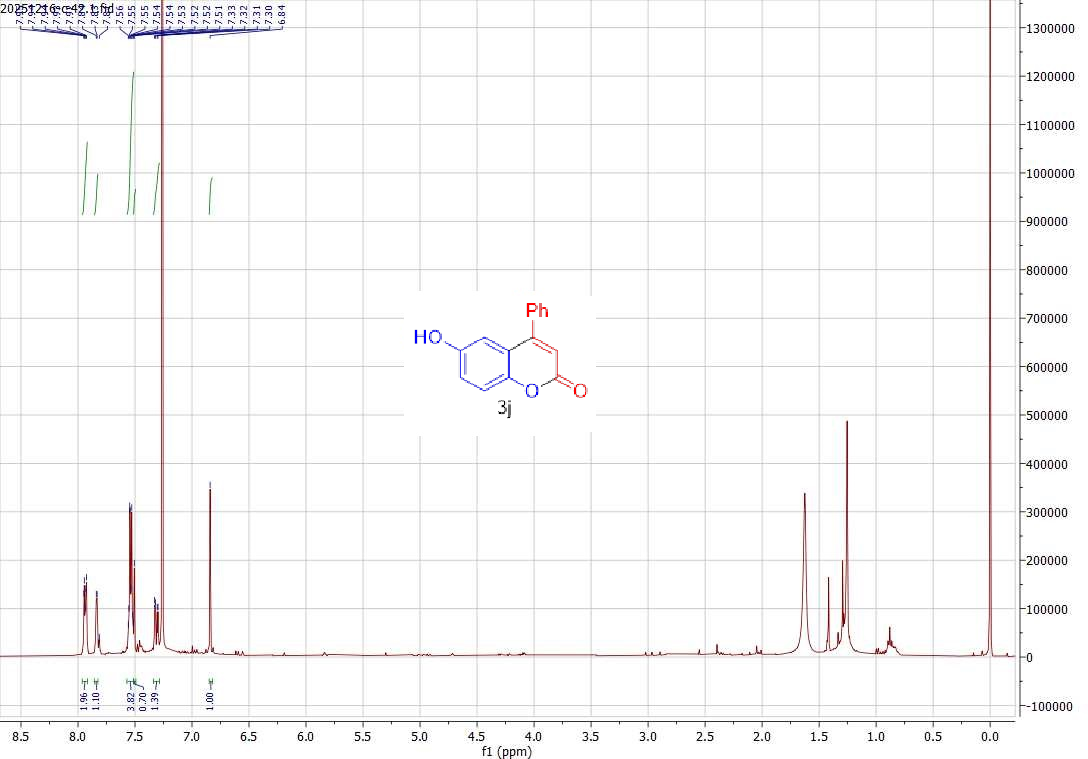


# 1H NMR of the compound 3k


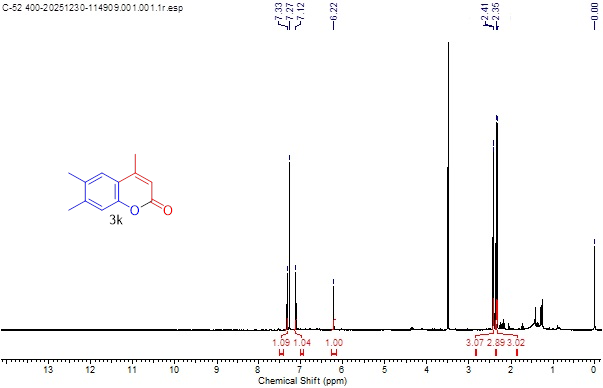


# 1H NMR of the compound 3l


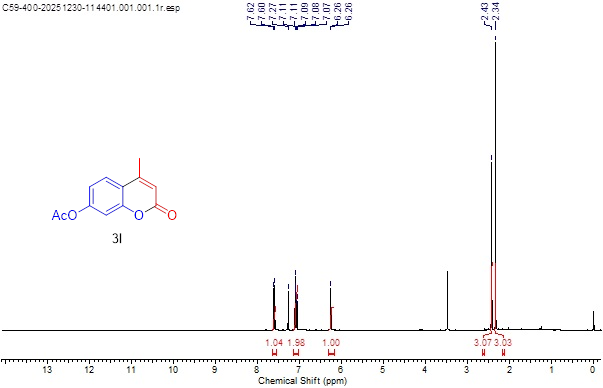


# 1H NMR of the compound 3m


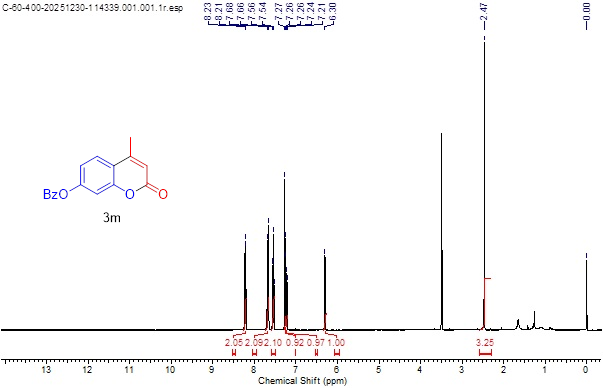

Supplement: Supplementary file 1 [file d14d883ed03131c8a72c69be.docx]
